# Supplementary material for: Non-SUMOylated CRMP2 decreases NaV1.7 currents via the endocytic proteins Numb, Nedd4-2 and Eps15
Source: PubMed Central journal article supplement (PMC7819318; doi:10.1186/s13041-020-00714-1), 2021-01-21

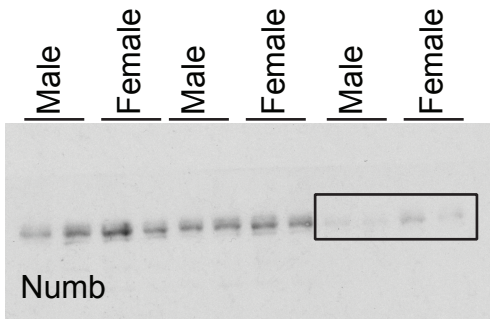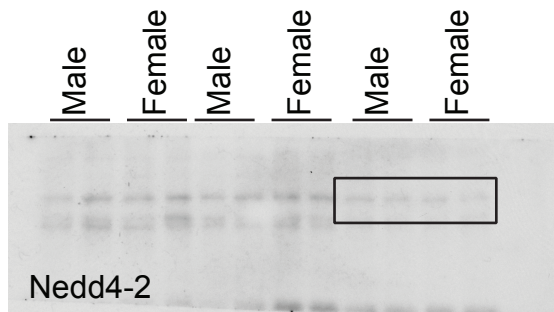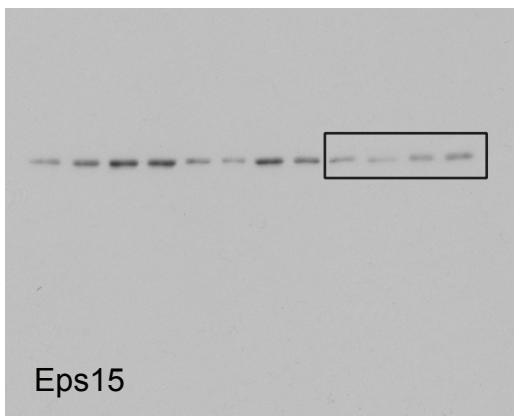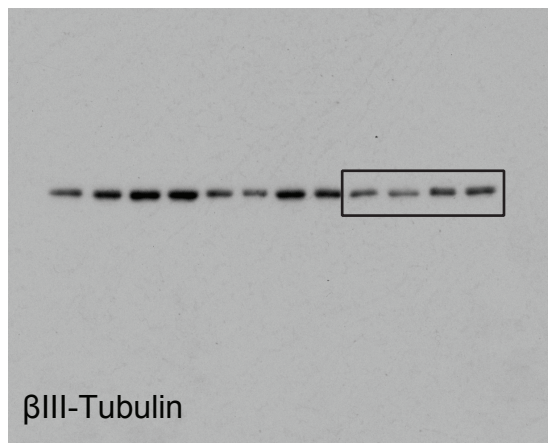

Supplement: 13041_2020_714_MOESM2_ESM.pdf [file 13041_2020_714_MOESM2_ESM.pdf]
