# Supplementary material for: Non-SUMOylated CRMP2 decreases NaV1.7 currents via the endocytic proteins Numb, Nedd4-2 and Eps15
Source: Mol Brain. 2021 Jan 21;14:20. doi: 10.1186/s13041-020-00714-1 (PMC7819318; doi:10.1186/s13041-020-00714-1)
Supplement: Supplementary file 1 — Additional file 1: Table S1. Raw quantified numerical data for all figures in the manuscript. [file 13041_2020_714_MOESM1_ESM.xlsx]

## Sheet: Figure 1A
Paw Withdrawal Threshold (g)
	0.1% DMSO										Pitstop2 2µg/5µl, i.t.
	WT					CRMP2K374A/K374A					WT					CRMP2K374A/K374A
pre-SNI	4	4	4	4	4	4	4	4	4	4	4	4	4	4	4	4	4	4	4	4
Post-SNI	2.34	0.156	2.34	0.04	1.328	0.543	0.507	0.04	0.066	0.265	0.304	0.05	3.769	4	0.127	0.156	0.05	1.228	0.208	0.04
Day 42 post-SNI	1.06	4	4	0.376	2.816	0.139	0.545	2.816	0.543	1.04	2.136	3.769	4	2.136	4	0.139	0.139	0.545	1.228	0.066
1 h post injection	4	4	4	0.103	1.569	0.05	0.208	1.569	0.422	1.06	0.208	0.543	0.643	0.376	0.208	0.05	0.545	0.208	0.376	0.04
2 h post injection	1.228	4	4	0.208	2.34	0.029	0.04	2.34	0.029	0.422	0.156	0.487	0.376	2.816	0.265	0.029	0.029	0.04	0.04	0.04
3 h post injection	4	4	4	0.066	4	0.156	0.367	0.066	0.376	2.34	0.265	0.746	4	4	2.136	0.156	0.156	0.367	4	0.103

## Sheet: Figure 1B
Area under the curve
0.1% DMSO		Pitstop2 2µg/5µl, i.t.
WT	CRMP2K374A/K374A	WT	CRMP2K374A/K374A
4.578	0.1928	4.844	0.1928
0	0.931	8.02	0.4232
0	3.098	6.981	0.931
0.596	0.7185	2.882	2.594
1.975	0.8498	8.459	0.05523

## Sheet: Figure 2
Relative expression (Normalized to Tubulin)
Numb		Eps15		Nedd4-2
Male	Female	Male	Female	Male	Female
96.8844	98.5862	111.52	54.619	89.0663	76.0188
98.1418	53.0118	101.077	81.3089	96.6361	84.0544
104.394	89.9788	106.212	109.168	91.0225	66.8434
100.58	110.429	81.1914	136.053	103.402	75.5521
107.263	146.149	104.904	62.7881	79.9935	71.4465
92.7371	67.6505	95.0961	49.7925	139.879	89.6004

## Sheet: Figure 3B
Voltage(mV)	WT+siRNA-control														WT+siRNA-Numb												CRMP2 K374A/K374A+siRNA-control												CRMP2 K374A/K374A+siRNA-Numb
-70	-4.05	-4.19	-3.99	-5.08	-7.38	-5.57	-5.57	-2.46	-2.6	-7.38	-4.08	-7.07	-2.45		-4.71	-2.28	-3.84	-3.75	-1.61	-3.3	-2.82	-2.83	-5.37	-11.15	-9.38		-5.31	-4.79	-3.87	-5.76	-3.39	-5.74	-12.02	-3.13	-3.11	-3.89	-3.95		-5.62	-4.79	-2.06	-3.66	-5.7	-5.74	-2.63	-4.74	-5.52	-4.48	-2.99
-65	-3.44	-5.54	-2.32	-3.72	-9.21	-4.78	-7.93	-1.93	-2.79	-3.63	-4.1	-8.33	-6.12		-5.16	-2.74	-3.07	-3.7	-1.77	-3.4	-1.89	-3.32	-7.12	-7.88	-6.81		-4.3	-2.78	-3.91	-5.64	-5.57	-5.26	-9.82	-4.15	-2.49	-3.09	-4.1		-4.21	-2.24	-2.17	-4.9	-5.69	-6.39	-6.54	-2.64	-5.48	-3.51	-3.32
-60	-4.2	-3.52	-3.85	-4.12	-9.02	-2.67	-4.79	-1.34	-3.56	-8.05	-3.78	-5.14	-13.37		-3.72	-3.25	-2.8	-4.79	-3.1	-2.22	-1.88	-3.83	-5.81	-10.88	-7.71		-5.46	-3.84	-4.72	-5.15	-5.05	-6.17	-11.31	-3.83	-3.71	-5.17	-3.75		-5.69	-5.2	-2.56	-4.27	-5.1	-5.68	-3.9	-3.6	-5.89	-5.38	-3.14
-55	-3.09	-4.31	-2.62	-3.93	-6.1	-2.1	-6.07	-1.84	-2.92	-5.74	-3.63	-31.01	-11.92		-3.92	-3.93	-3.1	-3.3	-2.37	-3.6	-2.34	-3.98	-6.46	-4.98	-7.06		-4.83	-3.12	-4.44	-3.59	-5.08	-3.97	-10.66	-4.38	-3.04	-4.29	-3.76		-4.39	-4.78	-2.73	-4.75	-3.91	-5.2	-5.47	-3.2	-5.87	-3.05	-3.59
-50	-3.05	-2.67	-4.03	-3.91	-6.36	-4.24	-6.26	-2.65	-2.91	-5.33	-4.51	-69.72	-19.29		-3.94	-2.75	-2.9	-5.84	-2.39	-2.58	-2.46	-2.66	-7.82	-4.44	-50.34		-4.22	-3.37	-4.53	-3.14	-3.59	-4.94	-8.47	-4.49	-3.57	-4.22	-4		-2.52	-5.37	-2.86	-5.76	-6.09	-6.04	-6.92	-3.72	-5.73	-2.93	-5.62
-45	-3.23	-3.88	-2.93	-3.83	-7.57	-3.45	-66.93	-2.17	-2.87	-7.98	-4.33	-75.55	-14.44		-3.03	-3.39	-2.72	-3.5	-1.89	-3.15	-2.97	-2.61	-7.24	-7.43	-78.79		-4.45	-3.18	-4.64	-4.62	-5.54	-4.13	-10.07	-4.19	-2.36	-3.78	-3.7		-9.93	-7.97	-2.6	-35.26	-5.36	-4.95	-5.17	-2.53	-6	-3.47	-3.47
-40	-2.81	-3.99	-4.51	-3.91	-4.7	-3.07	-90.03	-2.78	-2.94	-11.9	-5.23	-84.02	-14.65		-4.04	-3.2	-3.08	-3.98	-4.39	-3.35	-2.09	-3.49	-5.77	-4.8	-102.11		-4.96	-15.68	-4.25	-3.95	-5.67	-5.73	-5.62	-5.24	-3.62	-5.36	-2.16		-5.12	-10.55	-3.72	-28.6	-26.07	-5.91	-4.97	-4.41	-8.38	-2.69	-5.55
-35	-3.77	-4.16	-4.81	-2.75	-4.86	-3.68	-118.04	-4.98	-5.56	-11.48	-4.78	-78.08	-25.47		-2.8	-3.84	-35.66	-4.27	-11.92	-1.69	-3.74	-4.84	-6.64	-5.35	-87.41		-3.46	-195.62	-4.87	-7.77	-15.05	-5.81	-8.54	-5.77	-5.43	-3.12	-6.95		-7.87	-23.07	-21.55	-185.43	-59.05	-5.09	-9.57	-3.77	-136.61	-4.68	-11.26
-30	-10.54	-6.98	-4.51	-3.56	-5.57	-2.66	-142.15	-5.81	-15.7	-32.04	-8.57	-139.95	-43.34		-3.18	-12.2	-84.78	-4.99	-193.23	-3.54	-5.27	-10.61	-13.2	-14.21	-108.71		-6.57	-186	-7.62	-20.4	-53.71	-7.63	-22.55	-100.15	-22.27	-4.63	-15.02		-16.2	-369.29	-26.1	-189.38	-74.1	-5.98	-7.18	-3.92	-162.93	-5.33	-88.75
-25	-4.72	-5.39	-13.26	-7.77	-9.66	-4.33	-179.72	-8.74	-107.61	-83.72	-20.83	-304.41	-97.42		-5.99	-93.39	-173.04	-6.01	-338.89	-7.23	-8	-30.95	-36.5	-46.85	-190.67		-4.99	-173.59	-29.97	-59.56	-84.01	-18.95	-47.01	-169.56	-79.25	-4.17	-32.46		-48.9	-462.97	-55.61	-178.47	-93.09	-10.38	-61.76	-5.49	-184.74	-12.66	-106.24
-20	-8.86	-5.75	-30.07	-18.06	-22.35	-46.7	-232.07	-29.94	-219.65	-171.15	-68.29	-435.32	-168.64		-11.36	-99.26	-218.44	-24.76	-489.79	-24.38	-18.46	-103.35	-379.45	-64.99	-296.81		-4.33	-154.97	-35.31	-118.52	-111.6	-47.51	-73.81	-206.11	-108.04	-6.48	-60.63		-265.27	-474.91	-100.97	-172.87	-155.07	-20.4	-79.2	-9.43	-239.24	-34.16	-153.03
-15	-28.25	-12.23	-65.6	-50.82	-47.99	-76.02	-253.16	-132.75	-278.23	-259.41	-203.15	-543.59	-258.37		-30.42	-95.93	-318.43	-33.8	-528.7	-75.34	-60.55	-145.33	-437.08	-173.33	-319.92		-14.6	-138.31	-41.17	-162.55	-121.47	-72	-96.97	-246.25	-144.68	-85.77	-98.01		-340.41	-464.09	-136.99	-164.34	-186.43	-49.91	-74.58	-36.99	-328.51	-89.73	-182.28
-10	-163.74	-628.29	-99.24	-97.46	-108.09	-444.33	-258.38	-229.95	-291.28	-306.78	-304.79	-594.46	-303.68		-64.6	-92.3	-344.16	-59.91	-514.48	-114.52	-102.85	-163.14	-409.38	-429.03	-323.51		-348.76	-127.36	-49.94	-185.67	-121.9	-84.87	-102.63	-254.86	-159.01	-115.82	-105.55		-350.57	-439.4	-159.88	-155.45	-181.3	-81.9	-106.42	-475.1	-388.76	-158.65	-212.07
-5	-187.47	-599.92	-112.13	-132.51	-178.44	-494.4	-247.1	-271.17	-286.92	-335.53	-355.18	-614.18	-330.16		-117.9	-89.45	-350.46	-99.06	-498.08	-125.87	-124.24	-159.5	-389.3	-456.69	-318.54		-361.26	-120.97	-57.21	-188.8	-119.99	-89.83	-103.51	-261.94	-172.22	-174.71	-107.68		-349.01	-413.74	-163.42	-147.43	-171.52	-180.5	-177.2	-499.59	-398.5	-178.98	-214.75
0	-186.96	-569.29	-120.47	-157.7	-231.45	-481.55	-232.55	-291.9	-275.75	-332.8	-384.1	-603.94	-345.83		-142.53	-82.8	-340.36	-128.02	-465.68	-130.41	-136.48	-151.36	-360.67	-432.95	-308.18		-347.61	-114.59	-63.93	-188.48	-116.08	-89.31	-108.06	-260.3	-168.95	-215.65	-110.93		-334.75	-384.43	-161.58	-137.42	-161.64	-257.91	-472.18	-474.26	-389.29	-187.13	-213.57
5	-182.05	-532.91	-119.69	-162.93	-246.64	-459.06	-214.89	-308.35	-268.15	-325.13	-385.49	-591.28	-328.93		-150.16	-80.81	-320.36	-131.83	-422.14	-127.96	-138.82	-128.66	-332.32	-383.19	-284.56		-320.05	-104.11	-63.95	-180.4	-108.63	-86.79	-103.49	-248.14	-170.85	-233.19	-107.56		-316.23	-358.43	-157.92	-131.36	-145.65	-291.23	-606.5	-441.81	-373.32	-181.94	-215.93
10	-169.02	-491.31	-116.86	-166.56	-266.77	-432.78	-202.96	-293.56	-258	-302.11	-376.88	-544.2	-316.81		-153.71	-72.51	-299.19	-144.84	-370.57	-123.42	-138.02	-109.95	-314.27	-337.71	-261.29		-269	-93.32	-63.88	-168.43	-96.86	-84.03	-102.76	-228.61	-169.22	-233.19	-99.53		-293.52	-324.63	-157.22	-122.5	-138.83	-290.55	-640.5	-407.94	-348.96	-174.24	-189.49
15	-156.93	-458.83	-107.91	-158.29	-255.2	-409.53	-181.97	-264.54	-223.88	-268.22	-361.62	-512.1	-271.31		-143.76	-67.67	-270.14	-135.5	-338.91	-110.84	-122.61	-93.97	-277.87	-295.77	-237.09		-231.84	-86.49	-60.31	-145.44	-82.69	-77.55	-91.19	-202.24	-162.16	-223.21	-93.79		-272.3	-290.82	-148.08	-116.04	-123.33	-280.76	-641.93	-378.95	-324.3	-162.2	-181.17
20	-142.1	-421.68	-95.91	-149.03	-238.27	-381.6	-166.26	-264.57	-200.48	-243.98	-328.07	-464.31	-225.15		-132.35	-63.64	-243.79	-128.85	-303.51	-108.27	-116.89	-87.8	-249.03	-251.82	-213.95		-222.4	-83.68	-58.77	-132.03	-69.65	-69.46	-71.91	-184.85	-153.27	-210.28	-89.64		-251.17	-260.21	-136.81	-109.27	-107.94	-259.83	-624.02	-349.65	-299.09	-149.64	-171.08
25	-127.25	-384.27	-86.54	-133.89	-215.83	-358.45	-149.5	-248.13	-197.51	-211.97	-284.47	-424.96	-191.32		-118.48	-58.36	-204.26	-118.11	-270.07	-98.87	-103.95	-80.28	-215.69	-213.53	-182.31		-186.07	-80.56	-55.06	-116.01	-57.05	-55.14	-44.05	-171.49	-137.83	-200.67	-88.83		-227.22	-227.7	-123.66	-102.23	-95.05	-243.09	-594.4	-317.8	-278.62	-133.28	-158.1
30	-112.82	-350.01	-73.46	-120.88	-201.29	-331.53	-130.36	-236.6	-161.22	-174.94	-245.32	-384.44	-140.42		-106.05	-53.69	-161.73	-108.47	-236.7	-86.28	-89.7	-70.03	-191	-182.32	-146.71		-181.66	-71.26	-47.51	-96.48	-44.11	-39.94	-26	-157.15	-122.26	-183.15	-73.25		-198.16	-197.95	-112.43	-97.89	-79.89	-223.36	-540.34	-281.72	-254.39	-117.55	-144.12
35	-96.32	-308.36	-58.5	-104.34	-182.88	-303.06	-114.1	-206.78	-144.45	-140.34	-219.9	-340	-90.73		-92.18	-50.23	-113.7	-96.2	-207.59	-77.44	-80.6	-59.97	-161.66	-148.92	-122.66		-153.66	-66.89	-44.46	-71.33	-29.69	-22.08	-3.83	-137.15	-108.67	-165.23	-61.39		-169.9	-166.25	-102.13	-89.56	-67.94	-191.37	-473.82	-252.63	-221.71	-104.11	-124.43
40	-78.97	-272.8	-47.89	-85.59	-163.68	-275.46	-97.6	-190.29	-127	-108.11	-192.77	-304.68	-70.87		-76.1	-44.42	-78	-79.46	-178.8	-68.31	-70.02	-52.78	-138.57	-116.44	-94.37		-131.73	-57.77	-34.47	-48.93	-18.96	-2.28	-2.01	-118.45	-88.97	-150.42	-49.5		-133.98	-135.54	-92.28	-81.24	-52.75	-165.76	-406.61	-228.97	-198.87	-88.83	-112.93
45	-63.22	-237.98	-32.84	-59.32	-133.28	-249.48	-81.15	-168.73	-95.98	-76.54	-151.6	-255.63	-30.69		-61.15	-39.03	-42.89	-68.16	-153.81	-60.46	-57.08	-40.52	-102.06	-71.98	-70.88		-105.31	-49.34	-29.5	-27.44	-10.01	-1.99	0.5	-88.43	-78.5	-135.29	-31.23		-97.54	-109.52	-80.67	-74.75	-38.24	-135.97	-364.2	-207.37	-172.86	-72.65	-96.77
50	-47.99	-201.32	-19.28	-32.61	-106.45	-229.31	-66.06	-147.69	-72.45	-44.07	-106.6	-187.03	0.34		-46.58	-37.74	-12.72	-57.5	-123.28	-50.5	-41.87	-31.45	-72.35	-40.67	-54.68		-88.63	-46.78	-26.05	-3.35	-6.15	-0.34	1.67	-61.94	-63.04	-115.98	-18.36		-62.58	-81.02	-70.18	-67.64	-22.25	-104.11	-305.89	-172.92	-148.43	-59.58	-77.82
55	-35.19	-167.62	-19.33	-2.87	-76.14	-202.54	-48.69	-113.12	-58.65	-19.92	-75.92	-133.6	-5.1		-28.32	-33.55	-0.3	-44.04	-101.52	-38.62	-26.45	-23.05	-48.26	-18.5	-43.61		-71.56	-43.2	-23.94	-0.31	-2.53	-2.14	-5	-40.8	-45	-100.62	-12.91		-27.72	-58.34	-59.87	-63.85	-9.93	-70.36	-242.9	-141.2	-127.85	-47.7	-64.6
60	-24.78	-134.84	-10.53	-0.39	-43.72	-174.6	-33.91	-76.86	-49.88	-1.76	-48.16	-60.61	-1.47		-13.83	-29.53	-1.52	-29.29	-75.64	-29.06	-17.28	-15.64	-19.91	-6.71	-36.15		-57.26	-37.92	-17.57	-0.76	-5.11	-1.8	-5.57	-26.25	-32.68	-86.19	-0.15		-0.07	-40.84	-51.58	-58.33	-4.8	-35.28	-192.14	-115.2	-101.88	-33.89	-53.56
[truncated: 3 more columns]

## Sheet: Figure 3C
WT+siRNA-control	WT+siRNA-Numb	CRMP2 K374A/K374A+siRNA-control	CRMP2 K374A/K374A+siRNA-Numb
-186.96	-117.9	-347.61	-334.75
-569.29	-89.45	-114.59	-384.43
-120.47	-350.46	-63.93	-161.58
-157.7	-99.06	-188.48	-137.42
-231.45	-498.08	-116.08	-161.64
-481.55	-125.87	-89.31	-257.91
-232.55	-124.24	-108.06	-472.18
-291.9	-159.5	-260.3	-474.26
-275.75	-389.3	-168.95	-389.29
-332.8	-456.69	-215.65	-187.13
-384.1	-318.54	-110.93	-213.57
-603.94			-678.96
-345.83			-545.24
			-290.64

## Sheet: Figure 3D
G/Gmax	Voltage(mV)	WT+siRNA-control																WT+siRNA-Numb													CRMP2 K374A/K374A+siRNA-control											CRMP2 K374A/K374A+siRNA-Numb
	-70	0.01	0	0.01	0.01	0.01	0.01	0	0.01	0.01	0	0	0.01	0	0.01	0		0.01	0.01	0	0.01	0	0.01	0.01	0.01	0.01	0.01	0.01			0.01	0.02	0.02	0.01	0.01	0	0.01	0.01	0.01			0.01	0.01	0.01	0.01	0.02	0.01	0	0.01
	-65	0.01	0.01	0.01	0.01	0.01	0.01	0	0.02	0.02	0	0	0	0	0.01	0.01		0.01	0.02	0	0.01	0	0.01	0.01	0.01	0.01	0.01	0.01			0.01	0.01	0.02	0.01	0.02	0.01	0.01	0.01	0.01			0.01	0	0.01	0.02	0.02	0.01	0	0
	-60	0.01	0	0.01	0.01	0.01	0	0	0.01	0.01	0	0.01	0.01	0	0	0.02		0.01	0.02	0	0.01	0	0.01	0.01	0.01	0.01	0.01	0.01			0.01	0.02	0.03	0.01	0.02	0.01	0.01	0.01	0.01			0.01	0.01	0.01	0.02	0.01	0.01	0	0
	-55	0.01	0	0.01	0.01	0.01	0	0	0.01	0.01	0	0.01	0.01	0	0.02	0.01		0.01	0.03	0	0.01	0	0.01	0.01	0.01	0.01	0.01	0.01			0.01	0.01	0.03	0.01	0.02	0.01	0.01	0.01	0.01			0.01	0.01	0.01	0.02	0.01	0.01	0	0
	-50	0.01	0	0.02	0.01	0.01	0.01	0	0.02	0.02	0	0.01	0.01	0.01	0.06	0.03		0.01	0.02	0	0.02	0	0.01	0.01	0.01	0.01	0.01	0.09			0.01	0.02	0.03	0.01	0.02	0.01	0.01	0.01	0.01			0	0.01	0.01	0.03	0.02	0.01	0	0
	-45	0.01	0	0.01	0.01	0.01	0	0.03	0.17	0.01	0	0.01	0.01	0.01	0.07	0.02		0.01	0.03	0	0.01	0	0.01	0.01	0.01	0.01	0.01	0.14			0.01	0.01	0.03	0.01	0.03	0.01	0.01	0.01	0.01			0.02	0.01	0.01	0.17	0.02	0.01	0	0
	-40	0.01	0	0.02	0.01	0.01	0	0	0.24	0.02	0.01	0.01	0.02	0.01	0.08	0.02		0.01	0.03	0	0.01	0.01	0.02	0.01	0.01	0.01	0.01	0.19			0.01	0.08	0.03	0.01	0.03	0.01	0.01	0.01	0.01			0.01	0.02	0.01	0.14	0.09	0.01	0	0.01
	-35	0.01	0.01	0.02	0.01	0.01	0.01	0	0.32	0.02	0.01	0.01	0.02	0.01	0.07	0.04		0.01	0.03	0.06	0.02	0.02	0.01	0.01	0.02	0.01	0.01	0.17			0.01	1	0.04	0.02	0.08	0.01	0.02	0.01	0.03			0.01	0.04	0.08	0.94	0.22	0.01	0.01	0.01
	-30	0.04	0.01	0.02	0.01	0.01	0	0.01	0.41	0.02	0.01	0.04	0.06	0.01	0.14	0.07		0.01	0.11	0.14	0.02	0.29	0.02	0.02	0.05	0.02	0.02	0.23			0.01	1	0.06	0.06	0.29	0.2	0.07	0.01	0.07			0.03	0.65	0.11	1	0.29	0.01	0.01	0.01
	-25	0.02	0.01	0.06	0.02	0.02	0.01	0.02	0.55	0.02	0.02	0.26	0.16	0.03	0.32	0.17		0.02	0.85	0.31	0.02	0.53	0.04	0.03	0.15	0.07	0.07	0.42			0.01	0.98	0.27	0.19	0.48	0.36	0.28	0.01	0.15			0.09	0.86	0.24	0.98	0.38	0.02	0.05	0.01
	-20	0.03	0.01	0.16	0.05	0.05	0.08	0.09	0.75	0.05	0.07	0.56	0.34	0.11	0.49	0.31		0.04	0.95	0.41	0.1	0.81	0.13	0.08	0.52	0.77	0.11	0.7			0.01	0.92	0.33	0.41	0.68	0.46	0.4	0.02	0.31			0.53	0.94	0.45	0.99	0.68	0.04	0.07	0.02
	-15	0.12	0.02	0.36	0.16	0.11	0.13	0.91	0.87	0.1	0.31	0.75	0.55	0.35	0.64	0.52		0.12	0.96	0.65	0.15	0.93	0.43	0.3	0.78	0.95	0.32	0.8			0.03	0.86	0.41	0.6	0.79	0.59	0.57	0.26	0.53			0.73	0.97	0.64	0.98	0.87	0.1	0.07	0.07
	-10	0.71	0.98	0.59	0.33	0.26	0.83	0.97	0.94	0.25	0.56	0.84	0.7	0.57	0.75	0.65		0.28	0.97	0.75	0.28	0.96	0.69	0.53	0.93	0.95	0.84	0.87			0.88	0.84	0.52	0.74	0.86	0.66	0.66	0.37	0.61			0.8	0.98	0.79	0.98	0.91	0.18	0.11	0.89
	-5	0.87	0.99	0.71	0.48	0.46	0.97	0.98	0.96	0.42	0.7	0.88	0.83	0.71	0.83	0.77		0.55	0.99	0.83	0.49	1	0.81	0.69	0.98	0.97	0.97	0.92			0.97	0.85	0.63	0.81	0.92	0.73	0.76	0.58	0.66			0.86	0.99	0.85	0.97	0.93	0.42	0.19	0.99
	0	0.93	1	0.83	0.62	0.64	0.99	0.98	0.97	0.63	0.8	0.9	0.89	0.82	0.87	0.89		0.71	0.97	0.88	0.67	1	0.89	0.81	1	0.97	1	0.96			1	0.86	0.76	0.89	0.97	0.78	0.8	0.76	0.74			0.88	0.99	0.89	0.95	0.95	0.64	0.53	1
	5	0.98	1	0.89	0.7	0.73	1	1	0.97	0.79	0.89	0.94	0.96	0.89	0.92	0.93		0.82	1	0.91	0.75	0.98	0.94	0.89	0.92	0.97	0.97	0.97			0.99	0.83	0.81	0.93	1	0.81	0.87	0.87	0.78			0.91	1	0.93	0.96	0.94	0.78	0.73	0.99
	10	0.98	0.99	0.96	0.78	0.86	0.99	1	1	0.84	0.91	0.98	0.98	0.95	0.92	1		0.91	0.95	0.95	0.89	0.93	0.97	0.97	0.86	1	0.95	0.98			0.91	0.8	0.88	0.97	0.99	0.83	0.93	0.93	0.79			0.92	0.99	0.99	0.95	0.99	0.85	0.83	0.99
	15	1	1	0.98	0.83	0.89	1	1	0.98	0.92	0.88	0.93	0.97	1	0.94	0.97		0.94	0.95	0.97	0.91	0.93	0.94	0.94	0.81	0.97	0.93	0.99			0.85	0.81	0.9	0.94	0.96	0.81	0.97	0.96	0.83			0.94	0.97	1	0.95	0.98	0.9	0.9	0.99
	20	1	1	0.98	0.88	0.92	0.99	1	0.99	0.97	0.94	0.92	1	1	0.94	0.93		0.96	0.96	1	0.95	0.92	1	0.99	0.85	0.97	0.9	1			0.9	0.85	0.95	0.98	0.93	0.84	1	0.97	0.89			0.97	0.97	1	0.95	0.97	0.92	0.95	0.99
	25	1	0.99	1	0.91	0.92	1	0.99	1	0.98	0.96	1	1	0.97	0.96	0.93		0.96	0.94	0.98	0.96	0.92	1	0.99	0.88	0.95	0.89	0.97			0.84	0.9	0.99	1	0.89	0.89	0.99	1	1			0.99	0.95	0.98	0.96	0.98	0.96	0.99	0.98
	30	1	1	0.98	0.96	0.97	1	0.99	0.99	1	1	0.92	0.97	0.95	0.98	0.83		0.99	0.94	0.94	0.99	0.91	0.96	0.96	0.88	0.97	0.9	0.91			0.93	0.88	0.95	1	0.83	0.95	0.99	0.99	0.96			0.99	0.94	0.97	0.98	0.97	1	1	0.96
	35	0.98	0.98	0.93	1	1	0.99	0.99	1	1	0.96	0.94	0.95	0.99	1	0.69		1	0.96	0.83	1	0.92	0.97	1	0.88	0.96	0.91	0.91			0.9	0.93	1	0.92	0.71	1	0.99	0.99	0.95			1	0.92	0.98	0.97	1	0.99	0.98	0.96
I/Imax	Voltage(mV)	WT+siRNA-control																WT+siRNA-Numb													CRMP2 K374A/K374A+siRNA-control											CRMP2 K374A/K374A+siRNA-Numb
	-110	0.98	1	0.91	0.95	0.98	1	1	0.96	1	0.97	0.88	0.95	1				0.99	0.9	1	0.96	1	0.99	0.96	0.94	0.94	1	1	1		1	1	0.97	0.98	1	1	1	0.98	0.99	1		0.97	0.99	1	1	1	0.96	1	1
	-100	0.98	0.98	0.96	0.98	1	1	0.95	0.98	1	1	0.92	0.99	0.99				1	0.89	0.99	0.99	0.93	1	0.98	0.98	0.98	0.94	0.92	0.95		0.93	0.96	1	0.98	0.99	0.98	0.96	0.98	1	0.86		0.99	1	0.94	0.97	0.99	0.98	0.98	0.94
	-90	1	0.92	1	0.99	0.95	0.98	0.9	1	0.99	1	1	1	0.88				1	0.94	1	1	0.85	0.98	1	1	1	0.84	0.89	0.94		0.86	0.92	1	1	0.95	0.93	0.89	1	0.99	0.78		1	0.99	0.91	0.9	0.97	1	0.97	0.77
	-80	1	0.85	1	1	0.93	0.98	0.84	1	0.95	0.9	1	0.98	0.79				0.97	1	0.97	0.96	0.79	0.84	0.96	0.99	0.99	0.76	0.82	0.85		0.72	0.87	0.96	0.97	0.98	0.85	0.84	0.98	0.96	0.64		1	0.95	0.74	0.83	0.95	1	0.93	0.67
	-70	0.96	0.75	0.97	0.96	0.96	0.95	0.78	0.97	0.8	0.78	0.99	0.95	0.66				0.9	0.87	0.93	0.89	0.66	0.57	0.92	0.88	0.88	0.71	0.74	0.7		0.56	0.47	0.79	0.82	0.83	0.67	0.81	0.89	0.95	0.51		0.92	0.83	0.52	0.79	0.89	0.99	0.9	0.57
	-60	0.92	0.59	0.85	0.89	0.95	0.9	0.71	0.75	0.73	0.65	0.79	0.78	0.13				0.71	0.49	0.83	0.66	0.43	0.17	0.66	0.55	0.55	0.62	0.6	0.51		0.41	0.28	0.35	0.57	0.64	0.64	0.67	0.67	0.85	0.29		0.71	0.6	0.46	0.62	0.76	0.96	0.86	0.48
	-50	0.87	0.46	0.55	0.65	0.9	0.76	0.65	0.29	0.28	0.47	0.49	0.5	0.03				0.35	0.14	0.76	0.32	0.39	0.11	0.33	0.16	0.16	0.41	0.46	0.31		0.32	0.17	0.29	0.31	0.56	0.57	0.49	0.32	0.66	0.21		0.4	0.3	0.37	0.47	0.69	0.95	0.81	0.37
	-40	0.72	0.41	0.45	0.34	0.54	0.48	0.54	0.05	0.13	0.4	0.13	0.26	0.02				0.13	0.05	0.72	0.08	0.34	0.09	0.04	0.08	0.08	0.36	0.28	0.05		0.22	0.1	0.26	0.13	0.5	0.53	0.33	0.12	0.37	0.17		0.16	0.11	0.35	0.36	0.63	0.91	0.77	0.35
	-30	0.5	0.36	0.42	0.25	0.2	0.21	0.28	0.01	0.1	0.36	0.06	0.06	0.01				0.05	0.05	0.64	0.04	0.29	0.04	0.02	0.08	0.08	0.26	0.14	0		0.09	0.04	0.18	0.02	0.4	0.32	0.2	0.06	0.11	0.13		0.04	0.03	0.24	0.37	0.44	0.86	0.72	0.29
	-20	0.35	0.22	0.34	0.23	0.04	0.04	0.06	0.01	0.07	0.18	0.04	0	0				0.02	0.03	0.52	0.04	0.16	0	0	0.06	0.06	0.11	0.06	0		0.03	0	0.02	0	0.16	0	0.04	0.02	0.03	0.01		0.01	0.01	0.06	0.27	0.11	0.58	0.53	0.05
	-10	0.11	0.05	0.13	0.14	0.02	0	0	0	0.02	0.04	0	0	0				0	0	0.12	0	0.01	0	0	0.01	0.01	0	0.02	0.01		0	0.01	0	0.01	0.01	0	0.01	0	0.01	0		0	0	0	0.09	0	0.12	0.09	0
	0	0.01	0	0	0.01	0.01	0	0	0	0	0	0	0.01	0.01				0	0	0	0	0	0	0	0	0	0.01	0	0.01		0.01	0.01	0	0.01	0	0	0	0	0	0		0	0	0	0.01	0	0	0	0
	10	0	0	0	0	0	0	0	0.01	0	0	0.01	0.01	0.01				0.01	0.01	0	0.02	0.01	0	0.01	0	0	0.02	0.01	0.01		0.02	0.01	0.01	0.02	0.03	0.04	0	0	0	0.02		0	0	0	0	0.02	0	0	0.04
[truncated: 7 more columns]

## Sheet: Figure 4B
Voltage(mV)	WT+siRNA-control												WT+siRNA-Nedd4-2																CRMP2 K374A/K374A+siRNA-control														CRMP2 K374A/K374A+siRNA-Nedd4-2
-70	-5.08	-3.17	-4.85	-6.73	-4.16	-2.96	-4.04	-3.01	-2.83	-2.46	-6.8		-2.33	-4.96	-5.14	-4.16	-2.76	-3.87	-8.01	-4.31	-4.11	-2.64	-4.62	-8.36	-3.03	-2.92	-4.09		-3.14	-2.66	-2.62	-4.91	-4.41	-5.7	-3.79	-5.07	-5.78	-3.44	-5.28	-3.22	-3.6		-3.62	-5.31	-2.05	-8.39	-7.48	-4.54	-3
-65	-3.76	-3.4	-5.76	-4.48	-4.33	-3.18	-4.06	-2.67	-2.9	-2.5	-5.94		-2.23	-3.71	-5.68	-3.66	-2.64	-2.44	-7	-3.57	-4.8	-2.73	-4.12	-5.22	-3.61	-3.68	-3.92		-3.41	-2.73	-2.26	-4.6	-3.39	-5.41	-4.14	-5.62	-5.78	-4.39	-3.96	-2.2	-3.49		-5.13	-5.27	-2.39	-7.01	-7.16	-5.54	-4.27
-60	-4.25	-3.34	-6.33	-6.19	-4.73	-2.69	-3.62	-6.38	-2.65	-3.69	-9.32		-1.31	-4.01	-5.47	-3.28	-2.05	-2.27	-7.16	-2.79	-4.26	-3.43	-2.43	-10.06	-1.27	-3.83	-4.63		-3.1	-2.31	-2.95	-5.05	-4.8	-4.98	-4.03	-5.32	-5.9	-4.59	-4.39	-2.56	-4		-5.25	-4.84	-2.67	-7.36	-11.37	-3.69	3.9
-55	-5.11	-2.94	-6.76	-5.79	-5.53	-4.1	-3.22	-3.43	-4.1	-3.8	-6.5		-2.09	-4.86	-4.93	-3.44	-2.42	-3.92	-7.04	-5.47	-3.21	-3.57	-3.71	-9.36	-1.97	-3.31	-4.03		-3.72	-7.94	-2.09	-5.34	-3.76	-4.24	-2.73	-3.76	-5.8	-2.64	-5.24	-4.18	-3.99		-4.82	-5.46	-1.77	-6.75	-8.65	-4.31	-6.44
-50	-3.9	-3.01	-7.02	-5.21	-7.09	-4.07	-3.66	-3.94	-2.41	-3.74	-7.58		-1.82	-5.15	-6.04	-4.03	-1.99	-2.43	-67.11	-4.12	-5.33	-3.89	-5.2	-5.3	-4.03	-4.03	-4.11		-3.46	-2.78	-2.87	-5.38	-5.54	-5.94	-3.14	-5.61	-5.17	-3.15	-4.36	-2.31	-3.77		-7.05	-3.65	-2.79	-7	-10.5	-4.71	-6.86
-45	-3.31	-3.34	-6.65	-9.9	-5.89	-2.26	-4.89	-4.38	-2.92	-3.73	-5.96		-1.69	-3.96	-3.21	-2.8	-2.54	-5.9	-72.05	-3.25	-4.53	-3.61	-3.89	-6.8	-3.84	-4.42	-5.9		-2.45	-5.36	-4.96	-6.07	-7.95	-3.76	-2.85	-4.85	-6.73	-5.45	-4.36	-4.85	-3.07		-3.88	-6.15	-2.9	-8.62	-13.6	-5.39	-7.22
-40	-3.96	-5.38	-8.55	-56.11	-5.11	-5.23	-6.03	-5.96	-3.24	-1.88	-6.23		-3.16	-6.03	-4.55	-3.05	-2.81	-5.87	-79.79	-4.39	-6.64	-3.35	-4.77	-6.39	-4.97	-4.7	-6.17		-3.09	-4.52	-24.37	-5.78	-14.6	-7.71	-4.89	-7.42	-7.24	-3.37	-4.88	-8.53	-3.64		-5.57	-10.82	-2.46	-19.86	-41.24	-6.04	-5.54
-35	-6.14	-6.71	-18.93	-83.22	-4.07	-6.49	-10.44	-3.36	-3.37	-3.18	-8.82		-2.2	-7.53	-4.09	-4.74	-3.62	-10.83	-90.49	-131.68	-588.77	-8.65	-2.79	-8.59	-19.05	-2.86	-9.19		-7.12	-17.85	-336.48	-15.76	-25.5	-20.63	-9.9	-11.47	-67.33	-4.77	-3.32	-29.93	-3.12		-4.67	-64.68	-3.7	-49.71	-213.07	-47.32	-4.87
-30	-12.98	-11	-37.59	-132.35	-4.46	-10.52	-29	-3.66	-5.33	-5.08	-441.73		-6.21	-9.78	-5.6	-2.93	-234.76	-340.99	-115.07	-180.67	-547.4	-8.87	-7.75	-4.86	-37.58	-4.16	-11.83		-18.5	-58.31	-326.66	-20.44	-71.94	-67.32	-25.37	-17.38	-71.77	-5.41	-4.2	-68.23	-4.35		-3.99	-1038.29	-9.54	-106.62	-446.09	-87.02	-7.04
-25	-27.72	-20.26	-77.48	-180.03	-3.84	-29.29	-114.9	-3.22	-14.93	-11.77	-466.13		-21.78	-15.73	-16.09	-7.19	-364.88	-329.49	-212.64	-253.47	-538.08	-35.51	-123.03	-6.58	-53.4	-4.35	-15.54		-154.45	-223.39	-311.1	-26.33	-73.33	-112.78	-59.77	-33.2	-72.78	-4.7	-7.25	-96.34	-10.01		-4.49	-980.59	-30.23	-151.61	-517.29	-148.69	-11.35
-20	-51.87	-35.93	-100.32	-218.95	-6.59	-328.25	-245.08	-5.43	-53.5	-32.68	-440.78		-117.16	-37.07	-37.02	-22.33	-388.29	-316.12	-365.75	-285.42	-562.31	-83.68	-219.47	-8.8	-68.73	-8.16	-28.67		-199.85	-254.68	-291.24	-38.3	-79.5	-134.27	-93.51	-49.95	-71.23	-17.01	-25.89	-111.98	-20.21		-10.74	-919.3	-97.19	-175.74	-477.35	-201.96	-22.76
-15	-94.18	-70.45	-131.1	-233.97	-17.72	-411.56	-311.07	-269.42	-745.28	-178.11	-418.13		-283.45	-65.22	-68.46	-106.03	-383.32	-287.76	-397.35	-309.23	-570.63	-425.52	-991.67	-6.91	-59.96	-21.95	-41.16		-198.29	-257.79	-268.83	-67.51	-84.71	-133.85	-112.39	-67.16	-63.52	-33.44	-56.57	-122.83	-25.66		-46.52	-869.71	-173.02	-185.47	-434.22	-234.73	-76.75
-10	-120.95	-119.92	-149.53	-232.22	-796.18	-415.04	-327.12	-248.24	-771.26	-343.67	-390.48		-347.36	-98.27	-96.23	-284.63	-368.43	-264.76	-393.69	-330.16	-548.11	-490.64	-971.38	-22.85	-56.93	-53.85	-73.59		-198.33	-251.87	-251.44	-113.18	-84.51	-129.3	-119.73	-83.46	-60.47	-47.74	-90.22	-126.93	-32.42		-919.61	-816.04	-203.81	-177.49	-417.46	-270	-465.51
-5	-135.28	-127.78	-155.96	-213.47	-798.84	-409.76	-310.41	-232.56	-766.84	-368.35	-367.11		-355.73	-142.52	-119.16	-315.63	-352.75	-245.79	-376.84	-335.32	-548.79	-511.17	-928.07	-632.5	-74.91	-115.76	-91.48		-190.49	-241.5	-226.11	-219.42	-90.41	-125.4	-118.92	-87.95	-50.33	-53.27	-104.18	-122.51	-38.57		-855.48	-750.66	-209.84	-168.95	-390.1	-282.43	-656.59
0	-143.98	-135.66	-149.78	-214.12	-761.06	-387.31	-284.35	-213.17	-737.35	-361.82	-341.91		-350.63	-169.09	-123.19	-317.49	-330.93	-238.31	-363.97	-334.87	-493.02	-530.49	-863.71	-608.85	-81.13	-338.4	-107		-182.09	-226.74	-209.1	-241.83	-90.9	-118.07	-132.17	-92.56	-49.65	-62.49	-116.44	-120.38	-38.55		-789.49	-696.99	-207.31	-152.54	-351.8	-295.32	-694.38
5	-146.76	-141.01	-150.93	-206.51	-719.95	-359.59	-259.88	-198.25	-699.44	-359	-315.25		-333.89	-166.96	-127.13	-308.53	-309.25	-218.87	-341.61	-323.47	-447.78	-527.88	-804.4	-586.27	-60.05	-393.3	-123.42		-166.82	-208.45	-193.56	-259.7	-89.83	-108.8	-116.1	-90.87	-46.33	-70.39	-112.02	-100.84	-34.88		-737.8	-638.11	-199.89	-131.62	-322.66	-296.1	-689.56
10	-141.29	-134.95	-138.25	-186.07	-670.2	-325.35	-236.34	-182.67	-641.59	-339.71	-285.23		-309.7	-173.65	-120.75	-289.97	-290.12	-209.37	-301.98	-304.79	-402.94	-530.16	-712.98	-527.9	-56.3	-395.05	-128.29		-150.7	-193.23	-177.26	-253.9	-83.98	-93.21	-112.72	-92.76	-38.42	-66.16	-108.08	-82.13	-31.68		-681.84	-574.15	-187.99	-105.18	-281.26	-298.34	-660.26
15	-122.11	-131.27	-123.16	-163.93	-621.66	-298.65	-210.51	-170.62	-601.16	-329.38	-255.25		-283.38	-158.77	-107.35	-269.74	-269.42	-189.41	-260.88	-284.4	-364.08	-498.1	-657.72	-450.65	-49.24	-388.97	-127.98		-132.65	-173.44	-157.79	-244.11	-77.01	-77.38	-106.52	-82.04	-31.73	-61.53	-99.87	-76.73	-27.51		-628.53	-512.65	-177.04	-77.51	-230.07	-270.99	-618.18
20	-113.55	-122.53	-108.17	-150.01	-566.73	-271.25	-179.41	-159.91	-564.13	-299.24	-220.67		-255.6	-148.96	-95.72	-242.55	-247.96	-171.14	-227.29	-265.29	-325.62	-439.22	-577.26	-383.11	-56.31	-366.29	-120.35		-115.17	-152.73	-144.06	-234.31	-69.36	-66.67	-96.86	-68.18	-26.39	-59.33	-94.48	-72.91	-26.58		-578.73	-441.84	-155.18	-55.75	-183.79	-244.87	-564.84
25	-102.92	-116.31	-94.3	-132.4	-510.51	-238.75	-144.38	-145.76	-526.57	-267.01	-190.21		-223.98	-134.75	-82.79	-218.07	-226.15	-152.29	-194.25	-245.49	-292.45	-342.13	-517.52	-360.69	-51.18	-343.37	-101.92		-99.23	-130.73	-129.62	-216.45	-62.82	-58.76	-84.47	-64.34	-23.25	-52.98	-83.7	-66.32	-23.82		-537.56	-376.13	-138.33	-28.73	-146.05	-213.78	-532.88
30	-84.67	-103.42	-84.02	-114.94	-466.08	-208.3	-115.97	-132.9	-487.59	-236.21	-166.23		-188.84	-125.95	-69.43	-192.63	-203.24	-139.38	-164.85	-213.18	-267.48	-294.62	-485.15	-263.88	-49.98	-315.48	-98.94		-80.79	-107.08	-116.24	-199.96	-52.19	-45.03	-66.23	-46.87	-24.86	-50.14	-74.76	-51.68	-20.69		-493.18	-308.88	-124.88	-0.6	-112.21	-195.1	-501.52
35	-75.84	-80.95	-70.65	-98.06	-423.77	-182.43	-95.47	-122.46	-435.67	-201.43	-139.42		-170.24	-116.4	-51.26	-163.67	-182.28	-127.54	-126.58	-184.22	-237.75	-294.09	-466.24	-186.93	-23.39	-291.37	-79.34		-62.07	-92.02	-102.46	-183.6	-45.74	-43.06	-55.3	-23.72	-22.39	-33.78	-59.66	-36.46	-16.84		-444.35	-246.02	-108.51	-1.1	-70.28	-175.35	-445.36
40	-59.66	-64.46	-49.88	-83.62	-377.69	-162.6	-71.57	-113.45	-381.48	-176.07	-115.51		-153.5	-103.13	-35.21	-136.1	-160.3	-107.56	-81.98	-148.33	-206.29	-262.9	-413.57	-136.55	-9.7	-262.17	-65.52		-43.7	-79.6	-93.2	-166.09	-40.2	-24.68	-38.48	-6.59	-13.38	-17.63	-45.31	-30.63	-13.82		-384.09	-183.51	-92.58	-3.22	-27.99	-144.27	-407.64
45	-44	-48.97	-35.63	-69.27	-328.03	-134.29	-41.38	-103.97	-342.82	-153.56	-99.22		-126.3	-91.62	-22.21	-113.44	-135.96	-90.08	-46.87	-112.52	-179.3	-227.19	-331.56	-113.6	-6.3	-221.29	-54.12		-29.38	-64.26	-79.72	-149.09	-35.97	-18.15	-19.93	-2.95	-8.21	-5.02	-31.29	-19.44	-11.61		-324.43	-126.22	-76.28	-0.95	-20.41	-123.13	-365.46
50	-34.03	-39.8	-19.69	-49.48	-284.57	-111.21	-19.36	-92.97	-314.6	-129.16	-74.45		-105.69	-75.01	-12.55	-83.59	-114.91	-83.74	-18.7	-74.53	-155.81	-171.43	-298.22	-95.17	-5.21	-177.11	-47.43		-18.5	-50.34	-73.36	-134.91	-29.95	-20.28	-0.08	-1.81	-5.83	-2.33	-20.39	-14.13	-8.75		-263.01	-66.67	-61.77	-0.4	-16.23	-113.95	-329.42
55	-25.64	-33.22	-2.32	-32.52	-224.42	-90.49	-0.07	-87.63	-273.24	-96.62	-56.54		-83.18	-60.13	-2.04	-55.69	-95.75	-70.17	-4.52	-39.29	-129.94	-146.85	-211.79	-78.95	-5.56	-134.09	-41.74		-11.23	-38.36	-62.96	-119.43	-27.6	-18.24	-0.47	0.18	-0.99	-1.59	-3.95	-10.08	-7.73		-223.75	-13.43	-42	-2.42	-10.33	-93.97	-282.81
60	-16.43	-26.29	2.43	-20.27	-169.95	-74.61	0.12	-80.36	-222	-73.83	-37.57		-71.65	-47.37	-1.06	-27.8	-79	-59.8	-1.94	-20.25	-111.17	-115.01	-155.65	-50.19	-4.34	-102.23	-29.73		-4.02	-28.12	-57.18	-105.27	-18.51	-12.42	-0.82	2.29	-4.06	-0.32	0.46	-5.42	-5.42		-177.81	-1.04	-27.42	-2.38	-10.58	-75.19	-217.94
[truncated: 13 more columns]

## Sheet: Figure 4C
WT+siRNA-control	WT+siRNA-Nedd4-2	CRMP2 K374A/K374A+siRNA-control	CRMP2 K374A/K374A+siRNA-Nedd4-2
-120.95	-350.63	-182.09	-789.49
-119.92	-169.09	-226.74	-696.99
-149.53	-123.19	-209.1	-207.31
-232.22	-317.49	-241.83	-152.54
-796.18	-330.93	-90.9	-351.8
-415.04	-238.31	-118.07	-295.32
-327.12	-363.97	-132.17	-694.38
-248.24	-334.87	-92.56	-454.28
-771.26	-493.02	-49.65	-665.09
-343.67	-530.49	-62.49	-175.6
-390.48	-863.71	-116.44	-98.37
	-608.85	-120.38	-635.9
	-81.13	-38.55	-207.65
	-338.4		-513.4
	-107		-633.12
			-337.15
			-233.32
			-387.22
			-307.9
			-926.23

## Sheet: Figure 4D
G/Gmax	Voltage(mV)	WT+siRNA-control													WT+siRNA-Nedd4-2																CRMP2 K374A/K374A+siRNA-control														CRMP2 K374A/K374A+siRNA-Nedd4-2
	-70	0.01	0.01	0.01	0.02	0.01	0	0	0.01	0.01	0	0.02	0.01		0	0.01	0.02	0.01	0	0.01	0.01	0.01	0	0	0	0.01	0.01	0	0.01		0.01	0.01	0.01	0.01	0.02	0.01	0.02	0.01	0.02	0.04	0.01	0.02			0	0	0.02	0.01	0.01
	-65	0.01	0.01	0.03	0.02	0.01	0	0	0.01	0.01	0	0.03	0.01		0	0.01	0.02	0.01	0	0.01	0.01	0	0.01	0	0	0	0.02	0	0.01		0.01	0.01	0.01	0.01	0.02	0	0.02	0.01	0.02	0.05	0.02	0.01			0	0.01	0.02	0.01	0.01
	-60	0.01	0.01	0.02	0.02	0.01	0	0	0.01	0.01	0	0.03	0.01		0	0.01	0.02	0	0	0.01	0.01	0	0	0	0	0.01	0.01	0	0.01		0.01	0.01	0.01	0.01	0.03	0.01	0.02	0.01	0.02	0.05	0.02	0.01			0	0.01	0.02	0.01	0.01
	-55	0.02	0.02	0.02	0.02	0.01	0	0.01	0.01	0.01	0	0.02	0.01		0	0.01	0.02	0.01	0	0.01	0.01	0.01	0	0	0	0.01	0.01	0	0.01		0.01	0.02	0.01	0.01	0.02	0.01	0.02	0.01	0.01	0.05	0.01	0.02			0	0	0.02	0.01	0.01
	-50	0.01	0.01	0.03	0.03	0.01	0.01	0.01	0.01	0.01	0	0.02	0.01		0	0.01	0.02	0.01	0	0.01	0.09	0.01	0.01	0	0	0	0.02	0	0.01		0.01	0.01	0.01	0.01	0.03	0.01	0.03	0.01	0.02	0.05	0.01	0.02			0	0.01	0.02	0.01	0.01
	-45	0.01	0.01	0.03	0.03	0.03	0	0	0.01	0.01	0	0.03	0.01		0	0.01	0.01	0	0	0.01	0.1	0	0.01	0	0	0.01	0.02	0.01	0.02		0.01	0.01	0.01	0.01	0.05	0.01	0.02	0.01	0.02	0.06	0.03	0.02			0	0.01	0.03	0.02	0.01
	-40	0.01	0.01	0.03	0.04	0.15	0	0.01	0.01	0.01	0	0.22	0.01		0.01	0.02	0.02	0.01	0.01	0.02	0.12	0.01	0.01	0	0	0.01	0.03	0.01	0.02		0.01	0.01	0.01	0.01	0.1	0.01	0.04	0.02	0.03	0.07	0.02	0.02			0.01	0.01	0.07	0.06	0.01
	-35	0.02	0.02	0.02	0.08	0.24	0	0.01	0.02	0.01	0	0.24	0.02		0	0.02	0.02	0.01	0.01	0.03	0.15	0.21	0.79	0.01	0	0.01	0.11	0	0.03		0.02	0.05	0.04	0.06	0.18	0.01	0.11	0.04	0.05	0.72	0.03	0.01			0.06	0.01	0.18	0.35	0.09
	-30	0.05	0.05	0.05	0.17	0.4	0	0.02	0.06	0.01	0.01	0.31	0.88		0.01	0.03	0.02	0.01	0.51	0.98	0.2	0.31	0.77	0.01	0.01	0.01	0.23	0.01	0.05		0.07	0.18	0.05	0.1	0.53	0.01	0.38	0.11	0.09	0.81	0.03	0.02			0.97	0.03	0.42	0.79	0.18
	-25	0.12	0.12	0.1	0.36	0.58	0	0.06	0.27	0.02	0.02	0.4	0.98		0.04	0.06	0.07	0.01	0.84	0.99	0.39	0.45	0.79	0.04	0.1	0.01	0.35	0.01	0.07		0.59	0.71	0.07	0.22	0.57	0.02	0.67	0.27	0.18	0.87	0.03	0.03			0.97	0.1	0.64	0.97	0.32
	-20	0.23	0.23	0.23	0.5	0.75	0.01	0.66	0.62	0.04	0.06	0.66	0.98		0.25	0.14	0.18	0.05	0.93	1	0.71	0.54	0.87	0.11	0.19	0.01	0.48	0.01	0.13		0.81	0.86	0.1	0.45	0.65	0.04	0.84	0.45	0.29	0.9	0.11	0.13			0.97	0.33	0.8	0.96	0.46
	-15	0.45	0.45	0.39	0.68	0.85	0.02	0.88	0.84	0.09	0.86	0.76	0.99		0.65	0.26	0.36	0.25	0.97	0.96	0.83	0.62	0.93	0.57	0.93	0.01	0.45	0.03	0.19		0.86	0.92	0.19	0.64	0.73	0.09	0.9	0.58	0.42	0.86	0.24	0.3			0.98	0.63	0.92	0.94	0.57
	-10	0.62	0.62	0.64	0.82	0.9	0.92	0.94	0.95	0.22	0.93	0.85	0.99		0.85	0.41	0.54	0.71	0.98	0.94	0.88	0.71	0.94	0.69	0.96	0.03	0.46	0.09	0.37		0.93	0.96	0.34	0.78	0.77	0.25	0.93	0.66	0.56	0.88	0.36	0.51			0.99	0.79	0.96	0.98	0.69
	-5	0.74	0.74	0.84	0.91	0.89	0.98	0.99	0.98	0.57	0.98	0.91	1		0.92	0.63	0.73	0.84	1	0.92	0.92	0.77	1	0.77	0.98	0.91	0.66	0.21	0.49		0.96	0.98	0.69	0.87	0.87	0.65	0.97	0.71	0.64	0.79	0.44	0.63			0.99	0.87	1	0.99	0.77
	0	0.85	0.85	0.92	0.93	0.96	0.99	1	0.98	0.79	0.99	0.96	1		0.97	0.8	0.82	0.91	1	0.96	0.97	0.83	0.96	0.85	0.97	0.95	0.77	0.64	0.61		1	0.99	0.8	0.93	0.94	0.79	0.99	0.86	0.74	0.85	0.56	0.76			1	0.92	1	0.98	0.86
	5	0.94	0.94	1	1	1	1	1	0.99	0.9	1	0.95	1		1	0.84	0.93	0.96	0.99	0.94	1	0.87	0.93	0.91	0.97	1	0.63	0.79	0.76		1	0.99	0.91	0.94	0.99	0.85	1	0.83	0.81	0.87	0.69	0.8			1	0.95	0.97	1	0.92
	10	0.99	0.99	0.99	0.98	0.98	1	0.98	1	0.94	0.98	0.92	0.99		1	0.94	0.98	0.98	1	0.97	0.98	0.9	0.9	0.98	0.93	0.99	0.65	0.86	0.86		1	1	0.95	0.99	1	0.87	0.94	0.9	0.92	0.8	0.73	0.85			1	0.97	0.88	0.98	1
	15	0.94	0.94	1	0.95	0.95	1	0.97	1	0.94	0.98	0.88	0.98		1	0.93	0.98	1	1	0.95	0.96	0.92	0.87	1	0.93	0.94	0.64	0.91	0.94		0.98	0.99	0.97	1	0.99	0.89	0.87	0.95	0.93	0.74	0.76	0.88			1	1	0.75	0.91	0.98
	20	0.98	0.98	0.93	0.9	0.97	0.98	0.97	0.97	0.92	0.99	0.86	0.94		0.98	0.95	0.99	0.99	1	0.94	0.96	0.96	0.85	0.96	0.89	0.91	0.82	0.93	0.97		0.96	0.96	1	0.98	0.98	0.97	0.85	0.99	0.89	0.7	0.84	0.94			0.98	0.97	0.65	0.85	0.97
	25	1	1	0.94	0.86	0.96	0.97	0.94	0.92	0.93	0.99	1	0.91		0.96	0.94	1	1	0.99	0.92	0.96	1	0.83	0.82	0.88	0.98	0.87	0.96	0.91		0.95	0.93	1	0.97	0.97	1	0.86	1	1	0.71	0.88	0.95			0.96	0.96	0.41	0.8	0.93
	30	0.94	0.94	0.78	0.85	0.96	0.97	0.92	0.89	1	1	0.97	0.92		0.9	0.97	1	1	0.98	0.93	0.98	0.99	0.84	0.79	0.92	0.84	1	0.97	1		0.92	0.87	1	0.98	0.9	0.99	0.77	0.94	0.9	0.9	1	1			0.94	0.97	0.01	0.76	0.95
	35	0.99	0.99	0.67	0.8	0.95	0.98	0.92	0.91	0.98	0.98	0.9	0.9		0.92	1	0.92	0.98	0.98	0.96	0.95	1	0.83	0.89	1	0.72	0.57	1	0.92		0.86	0.87	1	0.96	0.89	1	0.89	0.97	0.59	1	0.85	0.97			0.92	0.97	0.03	0.63	0.96
I/Imax	Voltage(mV)	WT+siRNA-control													WT+siRNA-Nedd4-2																CRMP2 K374A/K374A+siRNA-control														CRMP2 K374A/K374A+siRNA-Nedd4-2
	-110	1	1	0.95	1	1	1	1	0.92	0.97	1	0.99			0.99	1	0.96	0.91	1	1	0.96	0.98	1	1	0.95	1	1	0.94	1.01		0.91	1	1	0.98	1	0.96	0.98	1	1	0.92	0.95	0.98	0.96		0.98	1	1	0.98	1
	-100	0.97	0.99	1	0.99	0.99	0.96	1	0.89	1	0.95	1			1	0.99	0.97	0.94	0.99	0.94	0.96	1	0.92	0.94	0.87	0.95	0.78	0.99	0.99		0.92	0.95	0.96	0.99	0.99	1	1	0.92	0.88	0.91	0.97	1	1		1	0.93	0.92	1	0.9
	-90	0.95	0.95	0.96	0.9	0.97	0.91	0.98	0.86	0.99	0.98	1			0.98	0.98	1	0.96	0.99	0.85	1	0.97	0.94	0.93	1	0.91	0.68	1	0.98		0.96	0.93	0.95	1	1	0.91	1	0.9	0.64	1	0.99	0.87	0.97		0.96	0.86	0.9	0.88	0.78
	-80	0.83	0.92	0.83	0.76	0.93	0.94	0.94	0.87	0.97	0.94	0.93			0.9	0.93	0.97	0.99	0.98	0.75	0.94	0.92	0.92	0.96	0.94	0.71	0.62	0.97	0.92		1	0.92	0.88	0.98	0.97	0.7	0.92	0.72	0.46	0.98	1	0.6	0.9		0.92	0.76	0.82	0.78	0.69
	-70	0.58	0.78	0.57	0.47	0.93	0.91	0.78	1	0.98	0.86	0.84			0.8	0.87	0.81	1	0.93	0.51	0.83	0.76	0.71	0.72	0.91	0.66	0.15	0.98	0.82		0.78	0.76	0.66	0.91	0.94	0.36	0.66	0.68	0.38	0.95	0.95	0.28	0.63		0.87	0.59	0.69	0.56	0.58
	-60	0.26	0.69	0.46	0.38	0.91	0.87	0.64	0.79	0.95	0.75	0.87			0.55	0.72	0.52	0.96	0.82	0.53	0.75	0.57	0.5	0.49	0.74	0.72	0.09	0.94	0.72		0.48	0.5	0.44	0.77	0.87	0.13	0.46	0.6	0.19	0.67	0.72	0.19	0.25		0.74	0.44	0.71	0.43	0.51
	-50	0.12	0.38	0.42	0.32	0.8	0.73	0.53	0.6	0.8	0.36	0.8			0.23	0.51	0.23	0.74	0.64	0.5	0.66	0.47	0.38	0.36	0.35	0.74	0.03	0.93	0.65		0.18	0.13	0.17	0.52	0.71	0.03	0.44	0.51	0	0.42	0.43	0.14	0.12		0.5	0.42	0.39	0.36	0.41
	-40	0.04	0.32	0.32	0.23	0.62	0.45	0.43	0.3	0.47	0.16	0.77			0.18	0.45	0.22	0.27	0.47	0.45	0.57	0.4	0.29	0.35	0.2	0.43	0.06	0.92	0.53		0.14	0.04	0.09	0.3	0.63	0.01	0.4	0	0.04	0.17	0.38	0.1	0.03		0.43	0.36	0.01	0.29	0.32
	-30	0.01	0.27	0.14	0.06	0.6	0.08	0.17	0.24	0.36	0.1	0.7			0.15	0.38	0.2	0.14	0.32	0.24	0.33	0.27	0.11	0.34	0.12	0.2	0.02	0.93	0.34		0.12	0.02	0.05	0.18	0.5	0.01	0.28	0.02	0.02	0.11	0.36	0.04	0.01		0.38	0.24	0.02	0.12	0.16
	-20	0	0.15	0	0	0.54	0.01	0	0.21	0.33	0.06	0.41			0.08	0.14	0.12	0.13	0.16	0.06	0.1	0.08	0.02	0.2	0.09	0.11	0.02	0.82	0.07		0.07	0.01	0.01	0.1	0.15	0.01	0.04	0.03	0.02	0.06	0.28	0.01	0		0.16	0.05	0	0	0.03
	-10	0	0	0	0	0.37	0	0	0.11	0.28	0.01	0.08			0.01	0.01	0	0.07	0.03	0.01	0.02	0.01	0	0.02	0	0.05	0	0.3	0		0	0	0	0.02	0	0	0	0.07	0.09	0.01	0.02	0	0		0.01	0.02	0	0	0
	0	0	0	0	0	0.05	0	0	0	0.05	0	0			0	0	0	0	0	0	0	0	0.01	0	0	0	0	0	0		0.01	0	0	0	0.01	0	0.01	0.1	0.04	0	0	0	0		0	0	0.01	0	0
	10	0.01	0.01	0.01	0.01	0	0.01	0.01	0.02	0	0	0.01			0	0	0.01	0	0	0.02	0.01	0.01	0.01	0	0.01	0.01	0.01	0	0		0.02	0.01	0.01	0	0	0.02	0.01	0.14	0.59	0.01	0.02	0	0.01		0.01	0	0.02	0.01	0.01
[truncated: 15 more columns]

## Sheet: Figure 5B
Voltage(mV)	WT+siRNA-control												WT+siRNA-Eps15														CRMP2 K374A/K374A+siRNA-control														CRMP2 K374A/K374A+siRNA-Eps15
-70	-5.08	-3.17	-4.85	-6.73	-4.16	-2.96	-4.04	-3.01	-2.83	-2.46	-6.8		-2.85	-5.45	-4.87	-5.51	-4.21	-5.49	-5.9	-6.08	-2.68	-3.98	-6.04	-5.81	-4.93		-3.14	-2.66	-2.62	-4.91	-4.41	-5.7	-3.79	-5.07	-5.78	-3.44	-5.28	-3.22	-3.6		-2.28	-4.88	-2.59	-3.74	-3.45	-5.49	-3.47	-4.66	-4.06
-65	-3.76	-3.4	-5.76	-4.48	-4.33	-3.18	-4.06	-2.67	-2.9	-2.5	-5.94		-2.73	-5.35	-3.63	-7.03	-4.19	-5.49	-5.65	-8	-2.14	-4.05	-7.1	-4.28	-4.17		-3.41	-2.73	-2.26	-4.6	-3.39	-5.41	-4.14	-5.62	-5.78	-4.39	-3.96	-2.2	-3.49		-2.19	-4.33	-2.95	-2.49	-3.53	-5.58	-3.25	-1.95	-2.38
-60	-4.25	-3.34	-6.33	-6.19	-4.73	-2.69	-3.62	-6.38	-2.65	-3.69	-9.32		-3.55	-4.77	-4.16	-3.85	-3.68	-5.42	-6.84	-6.69	-1.85	-3.06	-7.16	-6.16	-3.86		-3.1	-2.31	-2.95	-5.05	-4.8	-4.98	-4.03	-5.32	-5.9	-4.59	-4.39	-2.56	-4		-1.15	-6.91	-2.86	-3.77	-2.42	-4.71	-3.96	-3.92	-3.36
-55	-5.11	-2.94	-6.76	-5.79	-5.53	-4.1	-3.22	-3.43	-4.1	-3.8	-6.5		-3.49	-4.09	-3.2	-5.11	-4.17	-4.53	-5.39	-5.44	-2.54	-4.22	-4.83	-7.14	-4.19		-3.72	-7.94	-2.09	-5.34	-3.76	-4.24	-2.73	-3.76	-5.8	-2.64	-5.24	-4.18	-3.99		-2.7	-6.03	-2.49	-3.12	-2.98	-5.98	-3.21	-5.19	-4.79
-50	-3.9	-3.01	-7.02	-5.21	-7.09	-4.07	-3.66	-3.94	-2.41	-3.74	-7.58		-5	-4.1	-3.69	-4.99	-3.44	-4.6	-5.73	-7.93	-1.96	-4.93	-8.41	-7.66	-5.58		-3.46	-2.78	-2.87	-5.38	-5.54	-5.94	-3.14	-5.61	-5.17	-3.15	-4.36	-2.31	-3.77		-5.93	-3.96	-2.32	-2.73	-4.35	-6.2	-3.34	-4.79	-7.26
-45	-3.31	-3.34	-6.65	-9.9	-5.89	-2.26	-4.89	-4.38	-2.92	-3.73	-5.96		-4.46	-4.89	-3.63	-4.73	-3.04	-6.12	-6.27	-4.72	-2.39	-2.77	-6.68	-12.02	-7.14		-2.45	-5.36	-4.96	-6.07	-7.95	-3.76	-2.85	-4.85	-6.73	-5.45	-4.36	-4.85	-3.07		-9	-6.97	-3.44	-3.59	-3.44	-24.69	-3.81	-7.59	-6.62
-40	-3.96	-5.38	-8.55	-56.11	-5.11	-5.23	-6.03	-5.96	-3.24	-1.88	-6.23		-4.57	-4.06	-4.93	-6.04	-96.01	-4.72	-7.94	-7.36	-3.89	-6.91	-7.07	-19.53	-9.05		-3.09	-4.52	-24.37	-5.78	-14.6	-7.71	-4.89	-7.42	-7.24	-3.37	-4.88	-8.53	-3.64		-2.62	-90.78	-3.25	-6.48	-6.72	-40.12	-5.59	-9.29	-5.78
-35	-6.14	-6.71	-18.93	-83.22	-4.07	-6.49	-10.44	-3.36	-3.37	-3.18	-8.82		-6.13	-4.78	-2.58	-5.13	-119.28	-9.41	-13.6	-7.03	-2.43	-6.43	-8.12	-33.09	-11.95		-7.12	-17.85	-336.48	-15.76	-25.5	-20.63	-9.9	-11.47	-67.33	-4.77	-3.32	-29.93	-3.12		-100.33	-995.72	-6.03	-12.53	-72.06	-47.08	-46.54	-198.85	-8.67
-30	-12.98	-11	-37.59	-132.35	-4.46	-10.52	-29	-3.66	-5.33	-5.08	-441.73		-84.83	-4.94	-3.89	-4.96	-140.63	-42.56	-35.28	-7.93	-3.46	-43.99	-14.01	-51.62	-23.54		-18.5	-58.31	-326.66	-20.44	-71.94	-67.32	-25.37	-17.38	-71.77	-5.41	-4.2	-68.23	-4.35		-148.85	-1042.87	-19.97	-32.65	-115.08	-61.09	-87.83	-923.3	-15.37
-25	-27.72	-20.26	-77.48	-180.03	-3.84	-29.29	-114.9	-3.22	-14.93	-11.77	-466.13		-258.82	-8.01	-3.68	-3.69	-154.26	-127.3	-91.14	-15.62	-4.72	-537.64	-33.85	-119.34	-75.83		-154.45	-223.39	-311.1	-26.33	-73.33	-112.78	-59.77	-33.2	-72.78	-4.7	-7.25	-96.34	-10.01		-409.17	-1068.16	-212.18	-62.94	-228.23	-77.51	-139.75	-971.23	-40.52
-20	-51.87	-35.93	-100.32	-218.95	-6.59	-328.25	-245.08	-5.43	-53.5	-32.68	-440.78		-631.52	-11.29	-6.96	-12.15	-161.18	-196.75	-156.57	-56.75	-8.19	-474.03	-107.5	-200.14	-192.35		-199.85	-254.68	-291.24	-38.3	-79.5	-134.27	-93.51	-49.95	-71.23	-17.01	-25.89	-111.98	-20.21		-756.72	-1068.62	-321.58	-81.68	-279.12	-91.75	-200.09	-922.52	-200.68
-15	-94.18	-70.45	-131.1	-233.97	-17.72	-411.56	-311.07	-269.42	-745.28	-178.11	-418.13		-632.74	-18.88	-5.97	-38.4	-159.97	-303.91	-197.23	-82.84	-57.41	-439.79	-225.37	-270.36	-276.43		-198.29	-257.79	-268.83	-67.51	-84.71	-133.85	-112.39	-67.16	-63.52	-33.44	-56.57	-122.83	-25.66		-801.8	-999.93	-339.13	-95.84	-280.43	-99.01	-242.68	-888.53	-1186.78
-10	-120.95	-119.92	-149.53	-232.22	-796.18	-415.04	-327.12	-248.24	-771.26	-343.67	-390.48		-639.99	-28.15	-12.55	-155	-145.16	-323.45	-210.9	-87.36	-102.8	-407.95	-313.28	-288.82	-280.71		-198.33	-251.87	-251.44	-113.18	-84.51	-129.3	-119.73	-83.46	-60.47	-47.74	-90.22	-126.93	-32.42		-789.08	-933.68	-332.8	-121.5	-272.48	-107.06	-254.34	-811.67	-1198.59
-5	-135.28	-127.78	-155.96	-213.47	-798.84	-409.76	-310.41	-232.56	-766.84	-368.35	-367.11		-596.48	-42.08	-46.95	-423.09	-133.18	-307.42	-214.33	-98.69	-836.32	-374.34	-367.25	-286.31	-257.18		-190.49	-241.5	-226.11	-219.42	-90.41	-125.4	-118.92	-87.95	-50.33	-53.27	-104.18	-122.51	-38.57		-733.29	-826.55	-316.42	-121.04	-262.49	-106.4	-266.2	-721.81	-1183.34
0	-143.98	-135.66	-149.78	-214.12	-761.06	-387.31	-284.35	-213.17	-737.35	-361.82	-341.91		-570.79	-58.37	-151.84	-504.6	-122.49	-294.3	-213.93	-139.94	-818.64	-343.81	-386.79	-269.79	-235.37		-182.09	-226.74	-209.1	-241.83	-90.9	-118.07	-132.17	-92.56	-49.65	-62.49	-116.44	-120.38	-38.55		-690.59	-729.8	-302.43	-118.76	-235.83	-107.51	-277.25	-695.69	-1108.8
5	-146.76	-141.01	-150.93	-206.51	-719.95	-359.59	-259.88	-198.25	-699.44	-359	-315.25		-524.21	-77.04	-311.51	-525.69	-110.48	-266.55	-199.1	-459.51	-784.61	-312.1	-399.13	-247.51	-210.53		-166.82	-208.45	-193.56	-259.7	-89.83	-108.8	-116.1	-90.87	-46.33	-70.39	-112.02	-100.84	-34.88		-650.24	-701.93	-282	-107.47	-237.87	-103.61	-268.84	-622.77	-1058.36
10	-141.29	-134.95	-138.25	-186.07	-670.2	-325.35	-236.34	-182.67	-641.59	-339.71	-285.23		-474.35	-82.79	-335.22	-512.44	-96.59	-230.69	-183.29	-452.08	-735.88	-283.91	-416.46	-226.33	-187.12		-150.7	-193.23	-177.26	-253.9	-83.98	-93.21	-112.72	-92.76	-38.42	-66.16	-108.08	-82.13	-31.68		-592.12	-637.91	-263.25	-104.34	-207.55	-93.83	-255.57	-523.29	-1012.79
15	-122.11	-131.27	-123.16	-163.93	-621.66	-298.65	-210.51	-170.62	-601.16	-329.38	-255.25		-445.18	-86.03	-348.53	-485.18	-83.48	-210.97	-163.67	-430.07	-682.89	-268.04	-389.52	-203.22	-169.06		-132.65	-173.44	-157.79	-244.11	-77.01	-77.38	-106.52	-82.04	-31.73	-61.53	-99.87	-76.73	-27.51		-556.86	-558.48	-232.97	-93.65	-202.09	-84.3	-245.35	-429.51	-922.46
20	-113.55	-122.53	-108.17	-150.01	-566.73	-271.25	-179.41	-159.91	-564.13	-299.24	-220.67		-407.99	-90.57	-347.63	-454.55	-69.6	-193.85	-133.34	-408.68	-644.14	-250.57	-353.08	-175.18	-146.6		-115.17	-152.73	-144.06	-234.31	-69.36	-66.67	-96.86	-68.18	-26.39	-59.33	-94.48	-72.91	-26.58		-538.29	-529.26	-196.67	-83.88	-175.06	-76.43	-244.01	-393.96	-829.67
25	-102.92	-116.31	-94.3	-132.4	-510.51	-238.75	-144.38	-145.76	-526.57	-267.01	-190.21		-348.16	-88.64	-326.93	-411.62	-57.8	-172.56	-115.94	-368.58	-601.83	-228.85	-327.33	-151.29	-132.16		-99.23	-130.73	-129.62	-216.45	-62.82	-58.76	-84.47	-64.34	-23.25	-52.98	-83.7	-66.32	-23.82		-487.35	-468.6	-171.6	-70.6	-130.39	-66.13	-235.76	-354.15	-740.21
30	-84.67	-103.42	-84.02	-114.94	-466.08	-208.3	-115.97	-132.9	-487.59	-236.21	-166.23		-295.7	-86.16	-309.04	-372.27	-49.93	-148.11	-92.08	-332.5	-562.32	-199.47	-303.95	-124.24	-113.5		-80.79	-107.08	-116.24	-199.96	-52.19	-45.03	-66.23	-46.87	-24.86	-50.14	-74.76	-51.68	-20.69		-403.11	-417.36	-137.18	-59.84	-112.17	-60.45	-220.67	-287.56	-697.21
35	-75.84	-80.95	-70.65	-98.06	-423.77	-182.43	-95.47	-122.46	-435.67	-201.43	-139.42		-272.91	-85.5	-288.64	-333.95	-42.02	-116.71	-66.24	-301.78	-513.69	-176.84	-279.95	-95.23	-89.08		-62.07	-92.02	-102.46	-183.6	-45.74	-43.06	-55.3	-23.72	-22.39	-33.78	-59.66	-36.46	-16.84		-360.92	-351.56	-109.18	-39.53	-88.5	-45.5	-202.66	-267.41	-612.21
40	-59.66	-64.46	-49.88	-83.62	-377.69	-162.6	-71.57	-113.45	-381.48	-176.07	-115.51		-237.25	-75.33	-257.79	-281.72	-33.22	-84.9	-42.24	-275.35	-454.73	-158.25	-256.75	-71.07	-67.49		-43.7	-79.6	-93.2	-166.09	-40.2	-24.68	-38.48	-6.59	-13.38	-17.63	-45.31	-30.63	-13.82		-316.67	-291.17	-88.68	-25	-72.35	-34.09	-174.63	-223.99	-522.32
45	-44	-48.97	-35.63	-69.27	-328.03	-134.29	-41.38	-103.97	-342.82	-153.56	-99.22		-197.72	-70.26	-226.11	-229.64	-19.67	-63.43	-9.9	-237.91	-417.55	-134.63	-208.98	-37	-50.26		-29.38	-64.26	-79.72	-149.09	-35.97	-18.15	-19.93	-2.95	-8.21	-5.02	-31.29	-19.44	-11.61		-284.89	-238.8	-80.07	-10.34	-58.68	-23.9	-150.23	-174.89	-424.92
50	-34.03	-39.8	-19.69	-49.48	-284.57	-111.21	-19.36	-92.97	-314.6	-129.16	-74.45		-162.21	-60.84	-203.44	-169.45	-6.81	-41.4	-1.72	-207.83	-367.43	-116.26	-168.57	-11.73	-29.63		-18.5	-50.34	-73.36	-134.91	-29.95	-20.28	-0.08	-1.81	-5.83	-2.33	-20.39	-14.13	-8.75		-233.34	-199.54	-67.37	-6.24	-42.48	-12.38	-129.1	-142.34	-351.54
55	-25.64	-33.22	-2.32	-32.52	-224.42	-90.49	-0.07	-87.63	-273.24	-96.62	-56.54		-154.55	-48.23	-168.84	-128.74	-3.04	-17.22	-3.91	-180.22	-312.28	-102.06	-125.94	-2.95	-10.78		-11.23	-38.36	-62.96	-119.43	-27.6	-18.24	-0.47	0.18	-0.99	-1.59	-3.95	-10.08	-7.73		-199.8	-163.96	-55.44	-1.13	-32.19	-5.67	-116.55	-114.81	-292.2
60	-16.43	-26.29	2.43	-20.27	-169.95	-74.61	0.12	-80.36	-222	-73.83	-37.57		-103.72	-40.73	-136.16	-71.63	-1.92	0.27	-1.12	-150.13	-253.02	-90.86	-84.51	-2.97	-2.38		-4.02	-28.12	-57.18	-105.27	-18.51	-12.42	-0.82	2.29	-4.06	-0.32	0.46	-5.42	-5.42		-161.4	-124.66	-39.73	-1.46	-23.9	-3.94	-100.62	-86.48	-195.92
[truncated: 14 more columns]

[truncated: 2 more sheets: Figure 5C, Figure 5D]
